# Supplementary material for: Maternal Gdf3 is an obligatory cofactor in Nodal signaling for embryonic axis formation in zebrafish
Source: eLife journal article supplement (doi:10.7554/elife.28534), 2017-11-15
Supplement: supp [file elife-28534-supp-v1.zip]

Archive with 8 entries (8 files):
- elife_poa_e28534_Figure_1_figure_supplement_3.pdf
- elife_poa_e28534_Figure_2_figure_supplement_1.pdf
- elife_poa_e28534_Figure_1_figure_supplement_4.pdf
- elife_poa_e28534_Figure_1_figure_supplement_5.pdf
- elife_poa_e28534_Figure_1_figure_supplement_1.pdf
- elife_poa_e28534_Figure_1_figure_supplement_2.pdf
- elife_poa_e28534_Figure_4_figure_supplement_1.pdf
- elife_poa_e28534_Transparent_Reporting_File.docx
