# Supplementary material for: Maternal Gdf3 is an obligatory cofactor in Nodal signaling for embryonic axis formation in zebrafish
Source: eLife journal article supplement (doi:10.7554/elife.28534), 2017-11-15
Supplement: supp [file elife-28534-supp-v1.zip › elife_poa_e28534_Figure_1_figure_supplement_1.pdf]

# *gdf3*

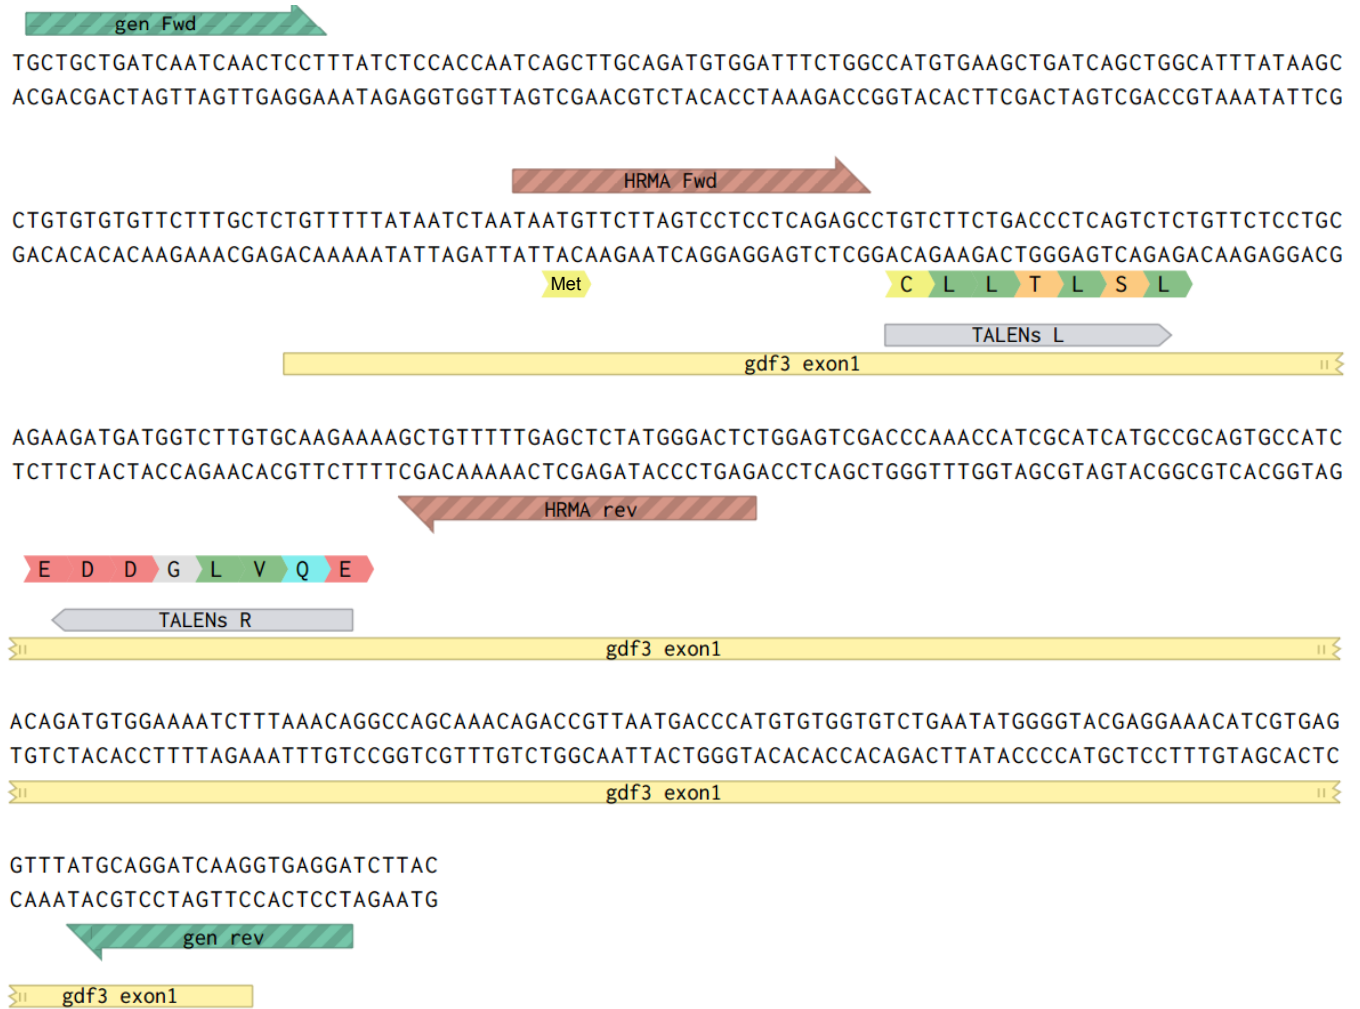

**Figure 1 - Figure supplement 1.** Map of the genomic sequences around the first coding exon of *gdf3*. Primers used to sequence genomic DNA flanking the TALEN target site are in green, HRMA primers are in brown and left (L) and right (R) TALENS are in grey.
