# Supplementary material for: Maternal Gdf3 is an obligatory cofactor in Nodal signaling for embryonic axis formation in zebrafish
Source: eLife journal article supplement (doi:10.7554/elife.28534), 2017-11-15
Supplement: supp [file elife-28534-supp-v1.zip › elife_poa_e28534_Figure_1_figure_supplement_2.pdf]

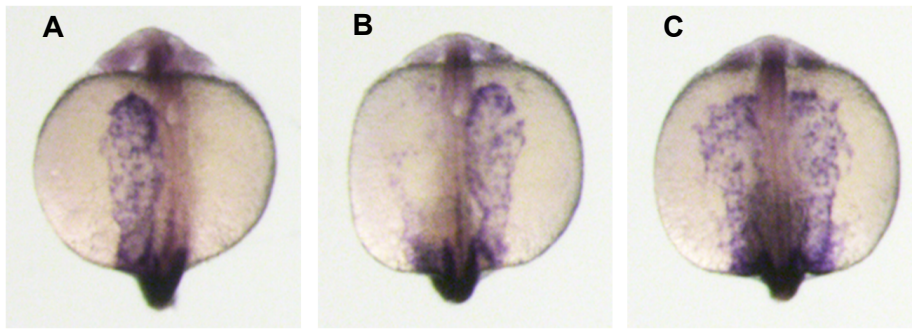

**Figure 1 – Figure supplement 2. The Left-Right patterning marker *spaw* is expressed in zygotic *gdf3* mutants.** (A-C) WISH analysis of *spaw* expression in 18-20 somite-stage embryos. The nodal paralogue *spaw* is normally expressed in the left lateral plate mesoderm. (A), but can also be observed in the right LPM (B) or expressed bilaterally (C). In embryos derived from crosses of *gdf3*<sup>zy51</sup> heterozygous parents 90% had left-sided, 2% right sided, and 8% bilateral expression (5 clutches; n=163 embryos total). The distribution of expression patterns seen in embryos derived from *gdf3* heterozygotes was similar to that in embryos derived from wild-type AB strain parents (93% left, 2.5% right, 4.5% bilateral; n=197, from 4 clutches). Midline staining is *myod1*, which identifies somites and is used as a staging marker.
