# Supplementary material for: Maternal Gdf3 is an obligatory cofactor in Nodal signaling for embryonic axis formation in zebrafish
Source: eLife journal article supplement (doi:10.7554/elife.28534), 2017-11-15
Supplement: supp [file elife-28534-supp-v1.zip › elife_poa_e28534_Figure_1_figure_supplement_5.pdf]

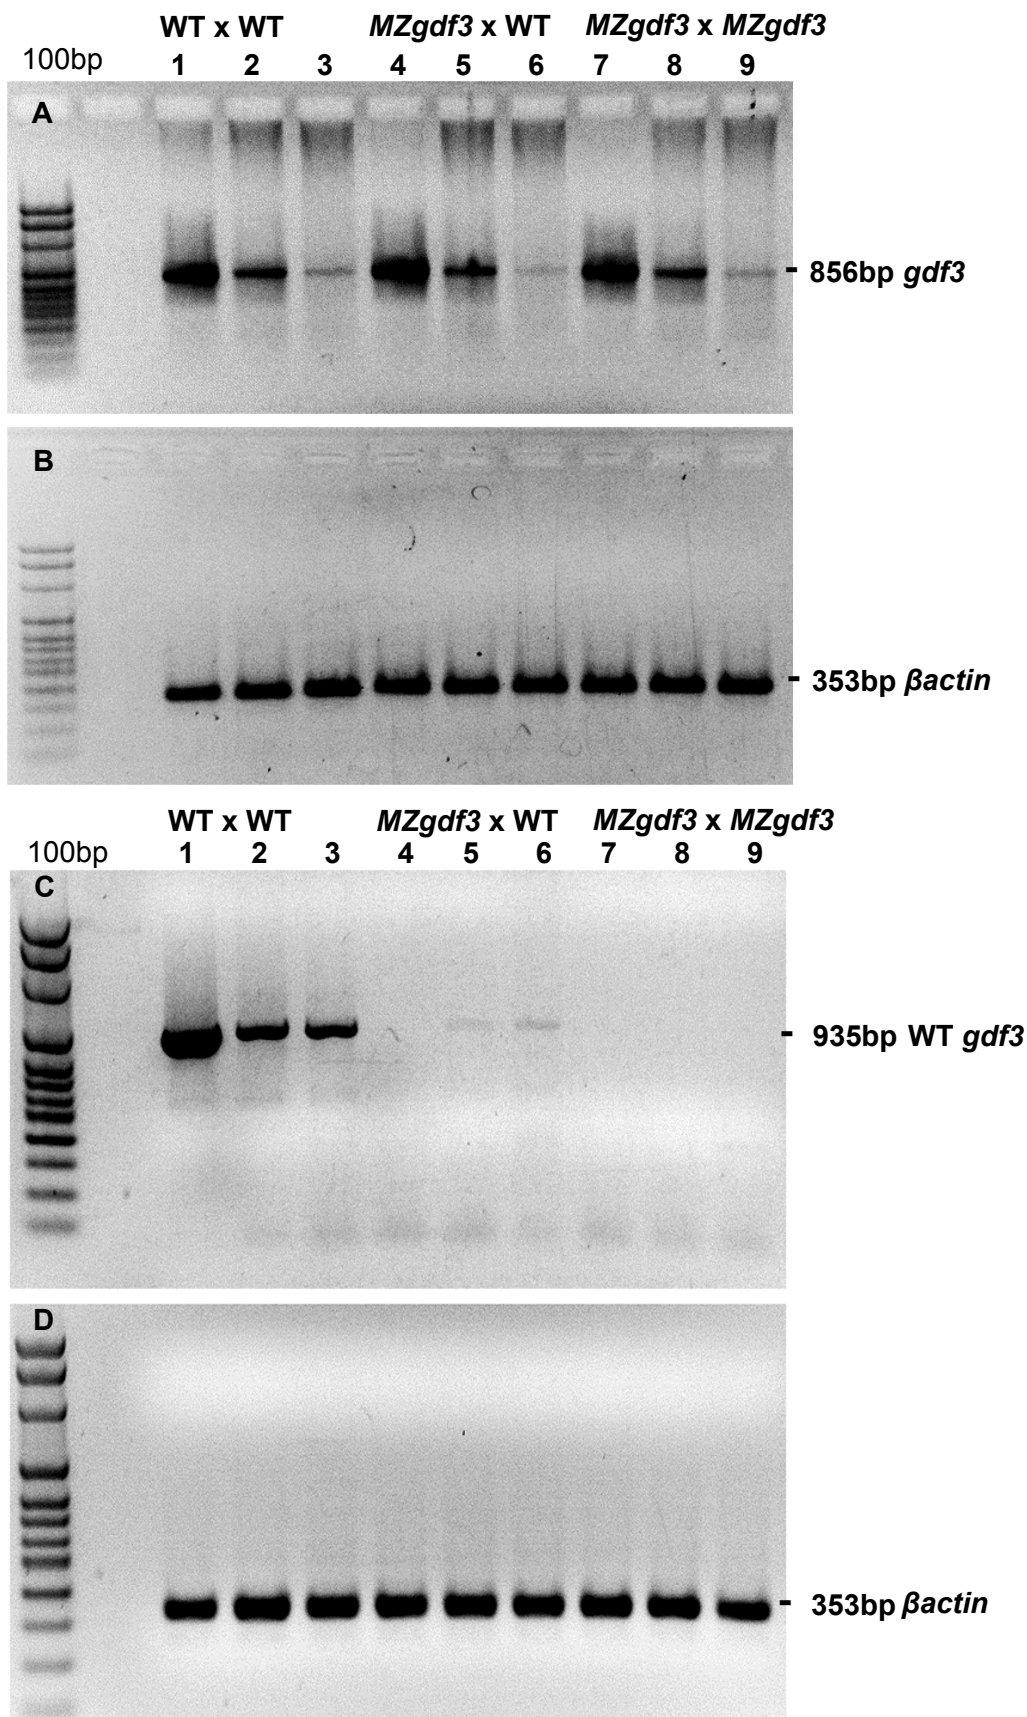

**Figure 1 - Figure supplement 5.** (A, B) RT-PCR analysis of cDNA prepared from 1000 cell-, 90% epiboly-, and 18 somite-stage embryo RNA, respectively, from: (Lanes 1-3) WT embryos, (Lanes 4-6) embryos derived from a female *MZgdf3*<sup>zy51</sup> X WT male, and (Lanes 7-9) *MZgdf3*<sup>zy51</sup> embryos. PCR primers: *gdf3* cDNA fwd ACCCAAACCATCGCATCATG; *gdf3* cDNA rev TTTGATGGGAACGCAACAGG. (B) Control RT-PCR of replicate samples of those in panel A using *βactin* primers: *βactin* cDNA fwd CCCAAGGCCAACAGGGGAAA; *βactin* cDNA rev GGTGCCCATCTCCTGCTCAA. (C, D) RT-PCR analysis of cDNA prepared from the same stages and genotypes as in panels A, B. PCR Primers: (C) WT-specific *gdf3* fwd CCTCAGTCTCTGTTCTCCTGC; *gdf3* cDNA rev TTTGATGGGAACGCAACAGG. (D) *βactin* cDNA fwd CCCAAGGCCAACAGGGGAAA; *βactin* cDNA rev GGTGCCCATCTCCTGCTCAA.
