# Supplementary material for: Maternal Gdf3 is an obligatory cofactor in Nodal signaling for embryonic axis formation in zebrafish
Source: eLife journal article supplement (doi:10.7554/elife.28534), 2017-11-15
Supplement: supp [file elife-28534-supp-v1.zip › elife_poa_e28534_Figure_2_figure_supplement_1.pdf]

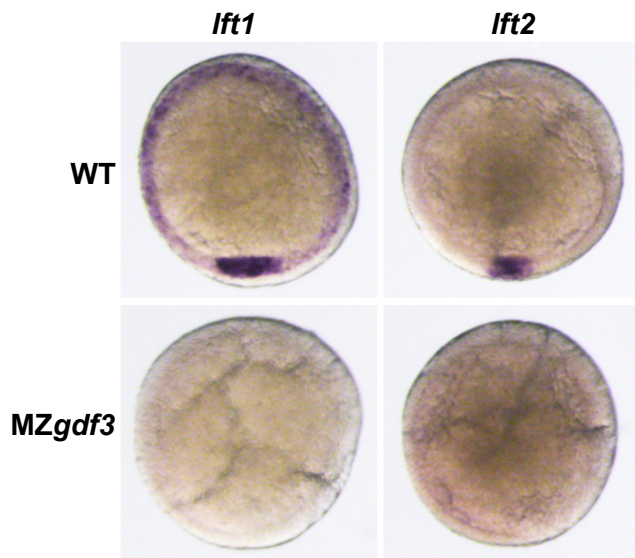

**Figure 2 – Figure supplement 1. Nodal antagonists *lft1* and *lft2* are not expressed in *MZgdf3*.** (A, B) Wild-type embryos at shield stage express *lft1* (A) in dorsal mesoderm at the dorsal shield and in mesendoderm precursors at the margin while *lft2* expression (B) is limited to the dorsal shield. Shield-stage embryos of *MZgdf3* do not express either *lft1* (C) or *lft2* (B).
