# Supplementary material for: Maternal Gdf3 is an obligatory cofactor in Nodal signaling for embryonic axis formation in zebrafish
Source: eLife journal article supplement (doi:10.7554/elife.28534), 2017-11-15
Supplement: supp [file elife-28534-supp-v1.zip › elife_poa_e28534_Figure_4_figure_supplement_1.pdf]

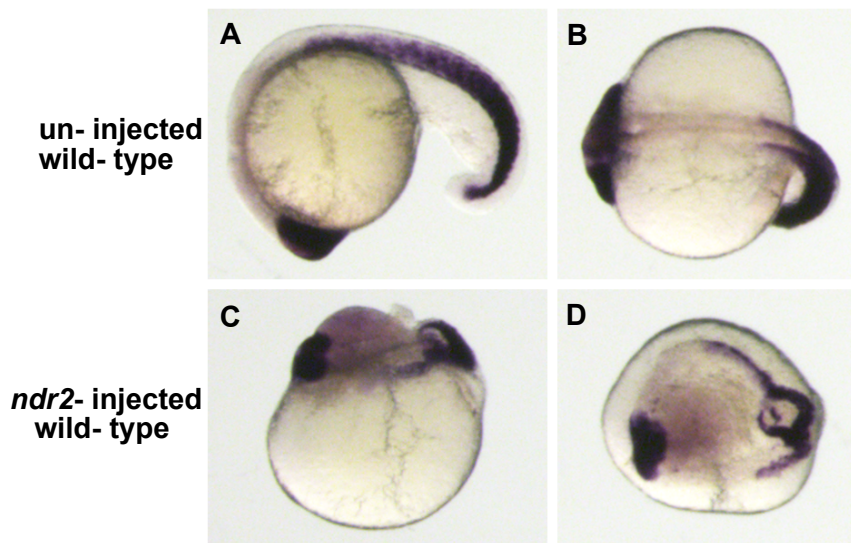

**Figure 4 – Figure supplement 1. Morphological alterations caused by *ndr2* overexpression.** WISH of 18 somite-stage embryos using probes to *six3b* which marks forebrain and retina and *myod1* which marks somites in the trunk and tail. (A) Lateral and (B) ventral views of an un-injected WT embryo. Lateral (C) and dorsal (D) views of a wild-type embryo injected at the 4-8 cell stage with *ndr2* showing a substantial disruption in the organization of embryonic axes and tissues.
